# Supplementary material for: One-staged combined decompression for the patients with cervico-thoracic tandem spinal stenosis
Source: Springer Nature journal article supplement (doi:10.1007/s00586-016-4497-1), 2016-03-07
Supplement: MOESM1 [file 8607976]

**Online Resource 1.** Individual clinical data and surgical results of 16 subjects with cervico-thoracic tandem spinal stenosis

| Demographic information |             |                | Surgical data                 |                |                             |                | Postoperative data |                                  |                   |                      |                             | Neurological outcomes |               |             |           |             |                   |
|-------------------------|-------------|----------------|-------------------------------|----------------|-----------------------------|----------------|--------------------|----------------------------------|-------------------|----------------------|-----------------------------|-----------------------|---------------|-------------|-----------|-------------|-------------------|
| Case No.                | Age (y)/Sex | Follo w-up (m) | Diagnosis                     | Cervical spine | Thoracic spine              | Duration (min) | Blood loss (ml)    | Subfascial drainage duration (d) | Hospital stay (d) | Neurolog ical status | Other complications         | Late events           | Preoperati ve | Short-ter m | Mid-te rm | Final JOA   | Recovery rate (%) |
| 1*                      | 59/F        | 28 (115)       | C: CSM<br>T: Disc & OLF       | ODL:<br>C3-C7  | Lam: T1-T4                  | 191            | 600                | 5                                | 13                | Improve ment         | CSF leak                    | Reoperation           | 9.0           | 11.0        | 9.5       | 10.0 (16.5) | 12.5 (93.8)       |
| 2                       | 54/F        | 102            | C: CSM & CSR<br>T: OPLL       | ODL:<br>C4-C7  | Lam: T1-T3                  | 142            | 250                | 5                                | 8                 | Improve ment         |                             |                       | 10.5          | 14.5        | 16.5      | 14.0        | 53.8              |
| 3                       | 61/F        | 94             | C: CSM<br>T: OPLL             | ODL:<br>C3-C7  | Lam: T1-T7                  | 229            | 3000               | 4                                | 12                | Deteriora tion       | CSF leak;<br>acute UR       | Paralysis; UR         | 10.0          | 5.5         | 7.0       | 7.5         | -35.7             |
| 4                       | 43/F        | 90             | C: CSM & CSR<br>T: OPLL & OLF | ODL:<br>C3-C7  | Lam: T1-T3                  | 180            | 600                | 3                                | 6                 | Improve ment         |                             |                       | 11.5          | 14.0        | 15.5      | 16.0        | 81.8              |
| 5*                      | 33/M        | 36 (78)        | C: CSM<br>T: Disc & OLF       | ODL:<br>C3-C7  | Lam: T1-T2                  | 122            | 700                | 4                                | 8                 | Improve ment         |                             | Reoperation           | 12.5          | 14.5        | 16.5      | 14.0 (17.0) | 33.3 (100.0)      |
| 6                       | 56/F        | 77             | C: CSM<br>T: OLF              | ODL:<br>C3-C7  | Lam: T2-T3                  | 111            | 400                | 5                                | 8                 | Improve ment         |                             |                       | 12.0          | 13.0        | 14.5      | 14.5        | 50.0              |
| 7                       | 57/F        | 76             | C: CSM & CSR<br>T: OPLL & OLF | ODL:<br>C3-C7  | Lam,; T1-T4                 | 276            | 2500               | 4                                | 37                | Deteriora tion       | CSF leak;<br>Lung infection | Pseudomening ocele    | 8.0           | 8.0         | 15.0      | 15.0        | 77.8              |
| 8*                      | 39/F        | 13 (74)        | C: CSM<br>T: OPLL & OLF       | ODL:<br>C3-C7  | LPF: T1-T3                  | 196            | 1000               | 4                                | 7                 | Improve ment         | CSF leak                    | Reoperation           | 8.0           | 10.0        | --        | 9.5 (16.0)  | 16.7 (85.7)       |
| 9                       | 51/M        | 63             | C: CSM<br>T: OPLL & OLF       | ODL:<br>C3-C7  | Lam: T1-T3                  | 417            | 600                | 6                                | 9                 | Improve ment         | CSF leak; New radiculopathy | Hand dysfunction      | 9.0           | 12.0        | 15.5      | 15.0        | 75.0              |
| 10                      | 66/F        | 56             | C: CSM<br>T: OPLL & OLF       | ODL:<br>C4-C7  | LPF: T1-T5<br>CD: T2/3      | 348            | 3500               | 6                                | 15                | Deteriora tion       | CSF leak                    |                       | 5.0           | 5.0         | 12.0      | 11.5        | 54.2              |
| 11                      | 62/F        | 55             | C: CSM<br>T: OPLL             | ODL:<br>C3-C7  | LPF: T1-T4                  | 197            | 1000               | 5                                | 7                 | Improve ment         | New radiculopathy           |                       | 10.0          | 14.0        | 16.5      | 15.5        | 78.6              |
| 12                      | 50/M        | 53             | C: CSM & CSR<br>T: OPLL & OLF | ODL:<br>C2-C7  | LPF: T1-T4<br>CD: T2/3      | 350            | 3000               | 9                                | 19                | Deteriora tion       | CSF leak;<br>acute UR       |                       | 12.5          | 14.0        | 17.0      | 17.0        | 100.0             |
| 13*                     | 69/M        | 9 (46)         | C: CSM<br>T: OPLL & OLF       | ODL:<br>C3-C7  | Lam: T1-T2                  | 231            | 650                | 4                                | 9                 | Improve ment         | CSF leak;<br>PTE            | Reoperation           | 11.5          | 13.0        | --        | 14.0 (14.5) | 45.5 (54.5)       |
| 14                      | 43/F        | 44             | C: CSM<br>T: OPLL             | LLF:<br>C6-C7  | LPF: T1-T6<br>CD: T1/2-T2/3 | 349            | 3500               | 5                                | 11                | Deteriora tion       | CSF leak                    |                       | 11.0          | 9.0         | 14.0      | 14.0        | 50.0              |
| 15                      | 46/F        | 37             | C: CSM<br>T: OPLL             | ODL:<br>C3-C7  | LPF: T1-T4<br>CD: T2/3      | 294            | 3000               | 5                                | 13                | Deteriora tion       | CSF leak                    |                       | 7.0           | 10.0        | 16.5      | 16.0        | 90.0              |
| 16                      | 49/F        | 36             | C: CSM<br>T: OPLL & OLF       | LLF:<br>C6-C7  | LPF: T1-T4                  | 251            | 1000               | 3                                | 8                 | Improve ment         |                             |                       | 8.5           | 13.0        | 15.5      | 15.0        | 76.5              |

\*Subjects who received another thoracic decompression and for whom the above records referred to the data before their second surgeries and numbers in red referred to data after the reoperation.

C stands for cervical spine; T, thoracic spine; CSM/R, cervical spondylotic myelopathy/radiculopathy; OPLL, ossification of posterior longitudinal ligament; OLF, ossification of ligamentum flavum; ODL, left open-door laminoplasty; LLF, laminectomy with lateral-mass fusion; Lam, laminectomy; LPF; Laminectomy with pedicle-screw fusion; UR, urinary retention; PTE, pulmonary thromboembolism.
